# Supplementary material for: Crossed Renal Ectopia without Fusion: An Uncommon Cause of Abdominal Mass
Source: Hindawi journal article supplement (doi:10.1155/2015/679342), 2015-01-01

## CDC Growth Charts: United States

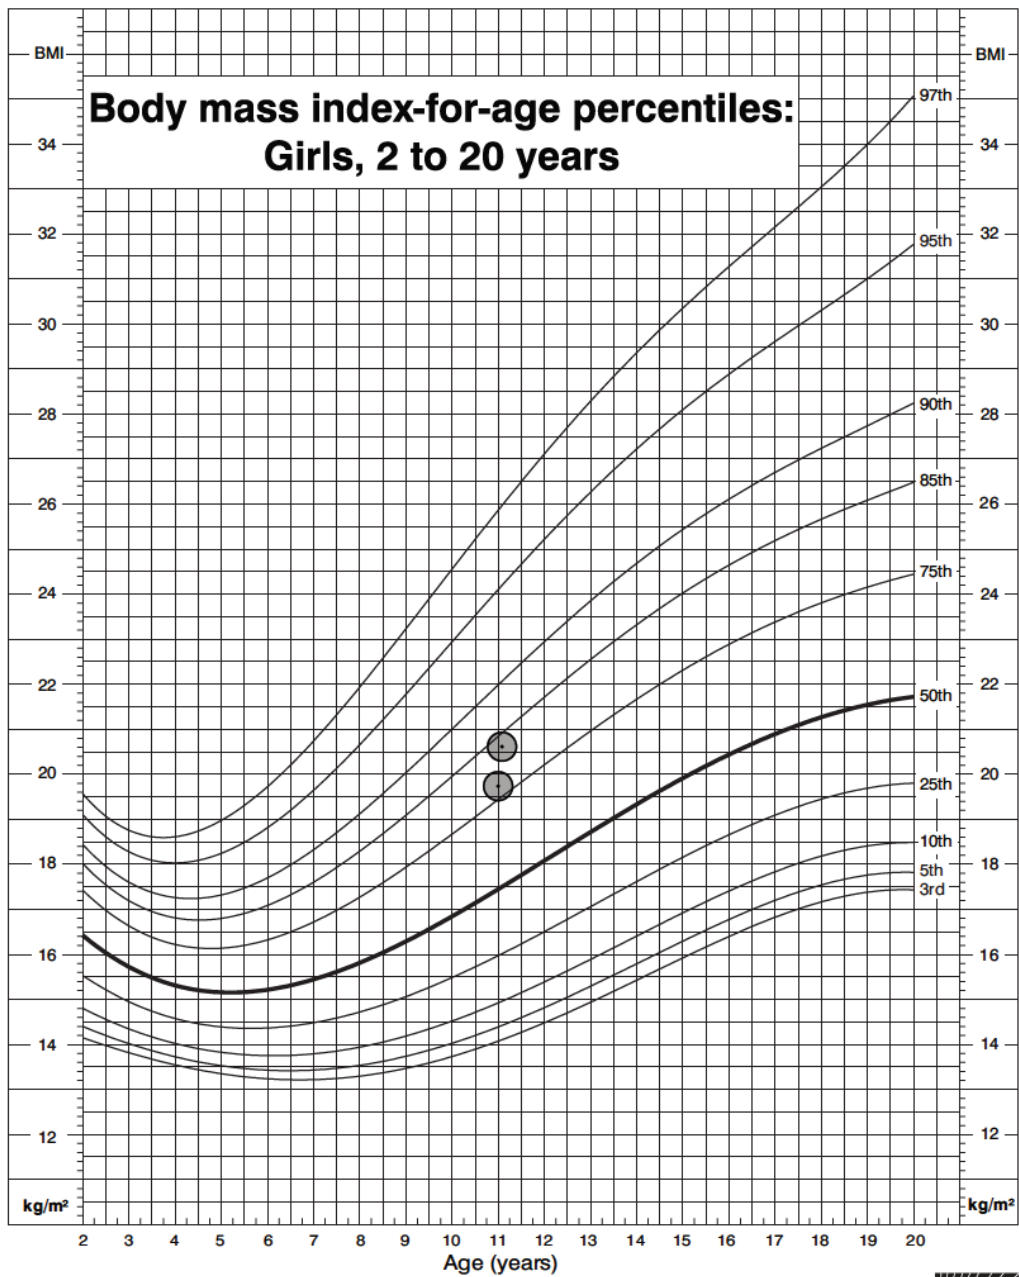

Published May 30, 2000.

SOURCE: Developed by the National Center for Health Statistics in collaboration with the National Center for Chronic Disease Prevention and Health Promotion (2000).

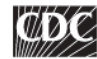

SAFER · HEALTHIER · PEOPLE™

# CDC Growth Charts: United States

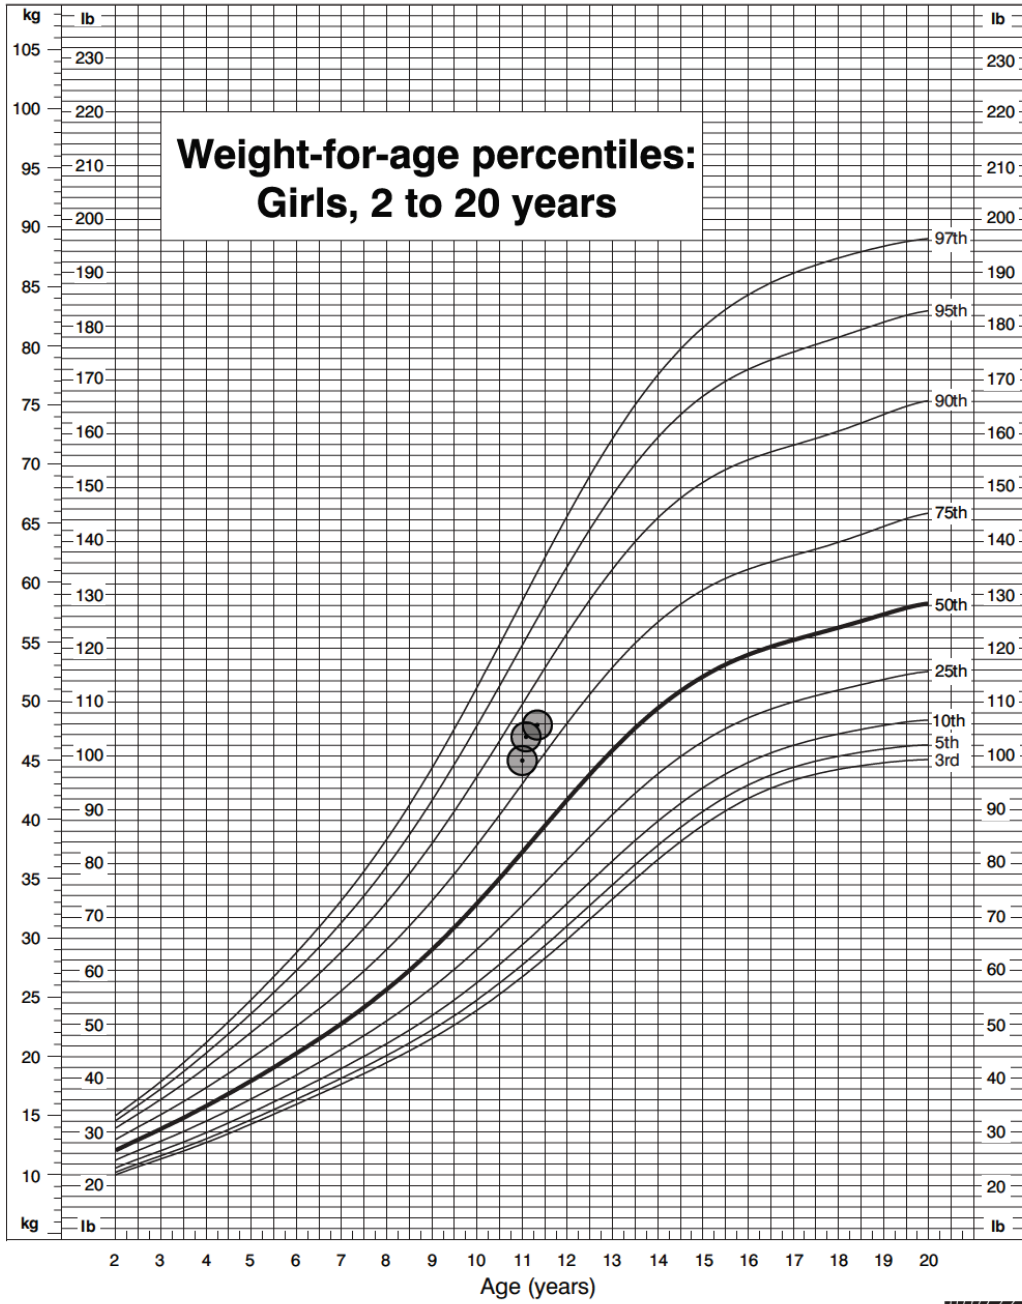

Published May 30, 2000.  
SOURCE: Developed by the National Center for Health Statistics in collaboration with  
the National Center for Chronic Disease Prevention and Health Promotion (2000).

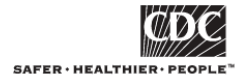

Supplement: f1 [file 679342.f1.pdf]
